1 **Host cell metabolism contributes to delayed-death kinetics of apicoplast inhibitors in**  
2 ***Toxoplasma gondii***

3

4 Katherine Amberg-Johnson<sup>a</sup>, Ellen Yeh<sup>abcd#</sup>

5

6 <sup>a</sup>Department of Microbiology & Immunology, Stanford University, California, USA

7 <sup>b</sup>Department of Biochemistry, Stanford University, California, USA

8 <sup>c</sup>Department of Pathology, Stanford University, California, USA

9 <sup>d</sup>Chan Zuckerberg Biohub, San Francisco, California, USA

10

11 Running Head: Effect of Apicoplast Inhibitors on *Toxoplasma gondii*

12

13 <sup>#</sup>Address correspondence to Ellen Yeh, [ellenyeh@stanford.edu](mailto:ellenyeh@stanford.edu).

14

15 **Abstract**

16 *Toxoplasma gondii* and related human parasites contain an essential plastid  
17 organelle called the apicoplast. Clinically-used antibiotics and other inhibitors that  
18 disrupt apicoplast biogenesis cause a mysterious “delayed-death” phenotype, in which  
19 parasite growth is unaffected during the first lytic cycle of inhibitor treatment but is  
20 severely inhibited in the second lytic cycle even after drug removal. Critical to  
21 understanding the complex downstream cellular effects of these drug classes is the timing  
22 of apicoplast loss during inhibitor treatment and how it relates to this peculiar growth  
23 phenotype. Here we show that, upon treatment with diverse classes of apicoplast

24 inhibitors, newly-replicated *T. gondii* parasites in the first lytic cycle initially form  
25 apicoplasts with defects in protein import or genome replication and eventually fail to  
26 inherit the apicoplast altogether. Despite the accumulation of parasites with defective or  
27 missing apicoplasts, growth is unaffected during the first lytic cycle, as previously  
28 observed. Strikingly, concomitant inhibition of host cell isoprenoid biosynthesis results in  
29 growth inhibition in the first lytic cycle and unmasks the apicoplast defects. These results  
30 suggest that defects in and even complete loss of the apicoplast in *T. gondii* are partially  
31 rescued by scavenging of host cell metabolites leading to death that is delayed. Our  
32 findings uncover host cell interactions that can alleviate apicoplast inhibition and  
33 highlight key differences in “delayed-death” inhibitors between *T. gondii* and  
34 *Plasmodium falciparum*.

35

## 36 **Introduction**

37 The Apicomplexan phylum contains human and animal parasites including  
38 *Toxoplasma gondii*, which cause opportunistic infections, and *Plasmodium* spp., which  
39 cause malaria. These parasites contain an essential plastid organelle called the apicoplast  
40 that is derived from secondary endosymbiosis of a red alga (1-3). While the apicoplast is  
41 no longer photosynthetic, it houses essential pathways for biosynthesis of fatty acids,  
42 heme, iron-sulfur clusters, and isoprenoid precursors (4-6). Apicoplast ribosome  
43 inhibitors, such as clindamycin and doxycycline, are used clinically for treatment of acute  
44 toxoplasmosis and malaria chemoprophylaxis, respectively (7, 8). In both *T. gondii*  
45 tachyzoites and blood-stage *P. falciparum*, these inhibitors cause a peculiar “delayed-  
46 death” phenotype *in vitro*: Treatment with inhibitors during the first lytic cycle has no

47 effect on parasite replication, egress of daughter parasites from the first host cell, or  
48 reinfection of new host cells. However, parasites subsequently fail to replicate in the  
49 second lytic cycle, even if the inhibitor is removed (9-11). In addition to structurally-  
50 diverse antibiotics targeting the prokaryotic ribosome, inhibitors of DNA gyrase  
51 (ciprofloxacin) and the apicoplast membrane metalloprotease FtsH1 (actinonin) also  
52 cause delayed death in *T. gondii*, indicating that drug properties do not account for the  
53 delayed growth inhibition and that delayed death is likely a result of complex  
54 downstream cellular effects of apicoplast inhibitors (9, 10, 12, 13).

55 Each of these apicoplast inhibitors causes defects in apicoplast biogenesis—its  
56 growth, division, and inheritance, leading to the formation of *T. gondii* parasites that are  
57 missing the apicoplast entirely (10, 12, 13). It is therefore surprising that these drug-  
58 treated parasites replicate to wild-type levels in the first lytic cycle during inhibitor  
59 treatment, as defects in or loss of the apicoplast should render parasites unable to produce  
60 essential apicoplast-derived metabolites (14). How parasites are able to compensate for  
61 this loss during the first lytic cycle remains poorly understood. Of note, growth kinetics  
62 resembling delayed death have also been observed for inhibitors that block apicoplast  
63 metabolic function and genetic disruption of proteins required for apicoplast biogenesis  
64 or metabolism, suggesting that inhibiting production of essential apicoplast metabolites  
65 may be the common perturbation leading to delayed death in *T. gondii* (5, 15-18).

66 A number of models have been proposed to explain how apicoplast defects lead to  
67 delayed death. One model proposes that apicoplast metabolites are only required for the  
68 successful establishment of a parasitophorous vacuole (PV) but are dispensable during  
69 intravacuolar replication (9). Another model proposes that growth of parasites with

70 defective apicoplasts during the first lytic cycle is supported by sister parasites with  
71 functioning apicoplasts in the same vacuole (19). These models, however, are  
72 inconsistent with experiments in which clindamycin-treated parasites were manually  
73 released from the host cell prior to completion of the first lytic cycle, separated from  
74 sister parasites, and allowed to establish a new infection. These drug-treated,  
75 prematurely-lysed parasites were able to establish a new PV and replicate, albeit at  
76 reduced rates that depended on the duration of drug treatment and number of replications  
77 in the previous vacuole (9). These parasites also eventually fail to replicate in the third or,  
78 with continued manual release, later lytic cycles (9), suggesting that the “delay” in  
79 growth inhibition is not strictly tied to lytic cycles. Thus neither of the proposed models  
80 is sufficient to explain the delayed-death phenotype.

81         Several key questions remain. First, what is the timing of apicoplast biogenesis  
82 defects and loss upon treatment with apicoplast inhibitors? Apicoplast loss is an  
83 important downstream cellular consequence of these inhibitors but has not been  
84 quantified during a full lytic cycle. Second, do apicoplast inhibitors with distinct  
85 molecular targets lead to different rates of apicoplast loss? While the literature would  
86 suggest similar phenotypes between diverse classes of apicoplast inhibitors, this has yet  
87 to be confirmed with a side-by-side comparison. Third, what is the role of the host cell in  
88 delayed death? We hypothesize that, since *T. gondii* replicates in a metabolically active  
89 host cell, host metabolites may compensate for apicoplast inhibition. Fourth, how do the  
90 downstream cellular effects of apicoplast inhibition differ between *T. gondii* and *P.*  
91 *falciparum*? Their distinct replication cycles, differences in their host cell metabolic  
92 activity, and the overlapping but distinct inhibitor classes that cause delayed death in

93 these parasites suggest different mechanisms underlie the seemingly similar delayed  
94 growth kinetics.

95 To address these questions, we validated an apicoplast marker to monitor  
96 apicoplast biogenesis defects and loss and show that multiple classes of apicoplast  
97 inhibitors cause gradual accumulation of parasites with disrupted or missing apicoplasts.  
98 Interestingly, the delayed-death growth kinetics caused by these apicoplast inhibitors is  
99 modulated by an inhibitor of host cell isoprenoid biosynthesis. These results clarify the  
100 complex downstream cellular effects of apicoplast inhibition in *T. gondii* and their  
101 similarities and differences to that in *P. falciparum*.

102

## 103 **Results**

### 104 **Apicoplast inhibitors cause reduced or absent FNR-RFP, an apicoplast marker.**

105 We selected three inhibitors that are well-documented to cause delayed-death in  
106 *T. gondii* and have strong evidence for their target in the apicoplast: actinonin (membrane  
107 metalloprotease FtsH1), clindamycin (ribosome), and ciprofloxacin (DNA gyrase) (5, 10,  
108 12, 13, 20). During treatment with these compounds, the apicoplast had been previously  
109 observed by microscopy of *T. gondii* RH parasites expressing an apicoplast-targeted  
110 ferredoxin NADP<sup>+</sup> reductase fused to red fluorescence protein (FNR-RFP) (12, 18, 21-  
111 24). In these experiments, treatment with apicoplast inhibitors leads to vacuoles with  
112 some parasites missing FNR-RFP fluorescence (10, 12, 18). While these studies  
113 suggested that the inhibitors lead to disruption of apicoplast biogenesis, it was unclear  
114 how exactly FNR-RFP fluorescence corresponded to apicoplast presence. Furthermore,  
115 since these studies used microscopy, they could only count apicoplasts in vacuoles

116 containing <8 parasites, corresponding to no more than 3 replications out of >6 total  
117 replications during the lytic cycle (10, 12, 18). To clarify these initial observations, we  
118 sought to develop a quantitative method to monitor apicoplast loss through a full lytic  
119 cycle. Because microscopy of large vacuoles with 8+ parasites is difficult, we used flow  
120 cytometry to count and quantify the FNR-RFP fluorescence of individual extracellular  
121 parasites after host cell egress.

122         We compared FNR-RFP fluorescence with the presence of the apicoplast genome,  
123 a known apicoplast marker. Briefly, parasites were treated with actinonin, clindamycin,  
124 or ciprofloxacin for a single lytic cycle. After natural egress from the first lytic cycle,  
125 egressed parasites were collected and their FNR-RFP fluorescence was quantified by  
126 flow cytometry (Fig 1A-B). While untreated parasites retained high levels of FNR-RFP  
127 fluorescence, treatment with each apicoplast inhibitor generated two populations of  
128 parasites: one devoid of FNR-RFP fluorescence [FNR-RFP(-)] and one in which FNR-  
129 RFP was detectable but with a mean fluorescence intensity 25-75% less than that of the  
130 untreated population [FNR-RFP(reduced)]. We sorted these two populations and  
131 quantified their apicoplast:nuclear genome ratio by qPCR (Fig 1C). The apicoplast  
132 genome was at reduced levels compared to untreated parasites but still detectable in  
133 FNR-RFP(reduced) parasites. In contrast, the apicoplast genome was below the detection  
134 limit in FNR-RFP(-) parasites, consistent with loss of the apicoplast in FNR-RFP(-)  
135 parasites. These results validate the use of the FNR-RFP fluorescence as a marker for  
136 apicoplast presence. It also suggests that, while the FNR-RFP(reduced) cells still contain  
137 the apicoplast, the apicoplast is defective given the reduced levels of FNR-RFP

138 fluorescence, lower apicoplast genome copy number, and failure of both populations to  
139 grow in the next lytic cycle (10, 12, 13).

140

141 **Apicoplast loss occurs gradually during the first lytic cycle.**

142 During the *T. gondii* lytic cycle, a single parasite undergoes >6 synchronous  
143 rounds of binary division forming >64 daughter parasites within a vacuole in the host cell  
144 (25). Apicoplast growth, division, and inheritance is coordinated with parasite replication  
145 leading to exactly one apicoplast per parasite (26). Because parasites grow to wild-type  
146 levels during the first lytic cycle during treatment, we were surprised to find that the large  
147 majority of parasites had either disrupted or undetectable apicoplasts at this time point  
148 (Fig 1A-C). We therefore further characterized the timing of apicoplast disruption during  
149 the first lytic cycle.

150 *T. gondii* parasites were treated with apicoplast biogenesis inhibitors and parasites  
151 were harvested after 6, 12, 24, 36, or 48 hours of treatment (Fig 2A). At each time point,  
152 we manually released parasites from host cells and assessed apicoplast status based on (1)  
153 apicoplast genome levels; (2) import of endogenous nuclear-encoded apicoplast proteins  
154 (27); (3) the mean FNR-RFP fluorescence intensity of the population retaining detectable  
155 FNR-RFP signal and (4) the percentage of cells containing detectable FNR-RFP (only  
156 apicoplast genome levels were assessed at 6h time point).

157 In the first 12 hours of the lytic cycle, *T. gondii* parasites invade host cells,  
158 establish a new PV, and divide once or twice. During this time, the only apicoplast defect  
159 observed is a slight reduction in the levels of the apicoplast genome for parasites treated  
160 with actinonin and ciprofloxacin (Fig 2B). After 24 hours, parasites have completed 3-4

161 divisions and reductions in levels of the apicoplast genome are detected for all apicoplast  
162 inhibitors (Fig 2B). Also at this time point, other apicoplast defects start to appear. We  
163 observed that drug-treated parasites begin to accumulate full-length Cpn60 (FL) (Fig 2C),  
164 indicating a defect in apicoplast protein import. The FNR-RFP fluorescence of parasites  
165 expressing measurable FNR-RFP, starts to dim for parasites treated with actinonin and  
166 clindamycin (Fig 2D). Lastly, FNR-RFP(-) parasites start to emerge in samples treated  
167 with actinonin (Fig 2E). These defects continue to accumulate for all drug-treated  
168 parasites. By 48 hours, *T. gondii* has completed 6-8 divisions and egressed from the host  
169 cell. At this time point, the apicoplast genome levels are reduced to 8-22% (Fig 2B), the  
170 proportion of (FL) *TgCpn60* has increased (Fig 2C), the mean levels of FNR-RFP  
171 fluorescence in the FNR-RFP(reduced) population is 25-50%, and 25-50% of parasites  
172 lose FNR-RFP fluorescence all together (FNR-RFP(-)) compared to untreated control  
173 parasites. Overall, we observe that *T. gondii* parasites treated with apicoplast inhibitors  
174 exhibit apicoplast biogenesis defects as early as the 2<sup>nd</sup> parasite replication and the  
175 severity of these defects worsen throughout the first lytic cycle of treatment, despite  
176 normal growth.

177

178 **Host isoprenoids are necessary for growth in the first lytic cycle upon treatment**  
179 **with apicoplast inhibitors.**

180 Because *T. gondii* parasites treated with apicoplast inhibitors accumulate  
181 apicoplast biogenesis defects and lose their apicoplast long before growth inhibition is  
182 observed (Fig 2D-E), we sought to determine whether the scavenging of host cell  
183 metabolites can compensate for the loss of one or more apicoplast metabolic functions.



184 Isoprenoid biosynthesis is an essential function of the apicoplast (5, 6), and scavenging of  
185 host cell isoprenoids by *T. gondii* has already been shown (28). Therefore parasites were  
186 co-treated with apicoplast inhibitors and atorvastatin, a specific inhibitor of host cell  
187 isoprenoid biosynthesis. As seen previously, treatment with 13  $\mu$ M atorvastatin alone did  
188 not affect parasite growth, suggesting that in the presence of an intact apicoplast host cell  
189 isoprenoid biosynthesis is not essential (Fig 3, Supplemental Fig 1) (28). However, unlike  
190 atorvastatin or apicoplast inhibitors alone, the combination of atorvastatin with actinonin,  
191 clindamycin, or ciprofloxacin caused parasite growth inhibition within the first lytic cycle  
192 (Fig 3, Supplemental Fig 1). Instead of growing to wild-type levels during a full 48-hour  
193 lytic cycle, growth defects are detectable starting 24 hours after treatment (Fig 3,  
194 Supplemental Fig 1). After 48 hours, parasites co-treated with atorvastatin and apicoplast  
195 inhibitors show 30-50% growth compared to parasites treated with apicoplast inhibitors  
196 only (Fig 3). The minimum inhibitory concentration (MIC) of apicoplast inhibitors for  
197 growth inhibition was similar in the presence and absence of atorvastatin, indicating that  
198 atorvastatin's potential effect on host cell permeability did not result in off-target effects  
199 (MIC = 20  $\mu$ M actinonin +/- atorvastatin; MIC = 4 nM clindamycin +/- atorvastatin).  
200 Rather, the altered kinetics of growth inhibition suggest that, with loss of apicoplast  
201 function, parasites either require host isoprenoid biosynthesis after 24 hours or deplete  
202 host isoprenoid reservoirs after 24 hours. We favor the former model since pretreatment  
203 of host cells with atorvastatin for 24 hours prior to infection with *T. gondii* showed  
204 similar results (Supplementary Figure 2).

205

206 **Discussion**

207 Our findings suggest the following model for the downstream cellular effects of  
208 apicoplast inhibitors in *T. gondii*. First, several classes of apicoplast inhibitors cause  
209 accumulation of apicoplast biogenesis defects and eventual apicoplast loss. We detect  
210 these defects beginning as early as the 2<sup>nd</sup> parasite replication in the first lytic cycle,  
211 preceding growth defects in the second lytic cycle.

212 Second, apicoplast biogenesis defects disrupt its biosynthetic functions important  
213 both for intravacuolar growth and likely establishment of infection in new host cells. This  
214 model predicts that direct inhibition of apicoplast biosynthetic pathways, without  
215 disrupting its biogenesis, will also cause delayed death, consistent with prior observations  
216 in the literature (16, 17).

217 Third, scavenging of host cell metabolites in the first lytic cycle can substitute for  
218 metabolites normally biosynthesized in the apicoplast. We specifically tested the  
219 scavenging of host cell isoprenoids, which was required 24 hours into the first lytic cycle.  
220 Host fatty acids and heme may also compensate for loss of these apicoplast biosynthetic  
221 functions, although we were unable to directly test these pathways given the lack of  
222 specific inhibitors. Overall, we propose that host cell metabolites support the growth of *T.*  
223 *gondii* during the first lytic cycle of apicoplast inhibition. Our results add to a growing  
224 body of work indicating that access to host metabolites regulates the essentiality of  
225 parasite metabolic pathways and the organelles that provide them (28-32).

226 Finally, host cell metabolites cannot compensate for the apicoplast indefinitely,  
227 since parasites treated with apicoplast inhibitors ultimately fail to replicate in later lytic  
228 cycles. It is possible that metabolites sourced from the apicoplast are required at the  
229 beginning of the lytic cycle for PV formation and host cell remodeling. If this is true, then

230 drug-treated parasites prematurely lysed from host cells may continue to grow in  
231 subsequent lytic cycles because the apicoplast is still partially functional at these early  
232 time points. Alternatively, a combination of host cell scavenging and accrued apicoplast  
233 metabolites may be sufficient during the first lytic cell but ultimately become depleted in  
234 subsequent lytic cycles. More experiments are required to differentiate between these  
235 scenarios, and ultimately reveal the essential products of the *T. gondii* apicoplast.

236         These downstream cellular effects of apicoplast biogenesis inhibitors in *T. gondii*  
237 differ from the known effects in *P. falciparum* in significant ways. First, we show that *T.*  
238 *gondii* parasites lacking apicoplasts accumulate over multiple parasite replications during  
239 the first lytic cycle. In contrast, blood-stage *P. falciparum* only undergoes a single round  
240 of parasite replication during each host lytic cycle, and apicoplast biogenesis is largely  
241 unaffected by treatment with apicoplast translation inhibitors during the first lytic cycle (a  
242 small reduction in apicoplast genome copies is sometimes observed) (11, 33). Second, we  
243 show that *T. gondii* parasites lacking apicoplasts are viable during the first lytic cycle,  
244 and apicoplast loss and parasite growth inhibition are temporally separated. In contrast,  
245 *P. falciparum* growth inhibition occurs concurrently with apicoplast biogenesis defects in  
246 the second lytic cycle most likely because apicoplast loss cannot be overcome by  
247 scavenging of host cell metabolites (6, 11). We suspect this is due to the different  
248 metabolic activities of their respective host cells: while *P. falciparum* grows in relatively  
249 inert red blood cells, *T. gondii* makes its home in metabolically-active host cells. Third,  
250 while all known apicoplast inhibitors cause delayed death in *T. gondii*, only the subset of  
251 apicoplast inhibitors that disrupt apicoplast genome expression cause delayed death in *P.*  
252 *falciparum* (12). The common defect leading to delayed death in *T. gondii* appears to be

253 loss of apicoplast metabolic function, while the common defect in *P. falciparum* delayed  
254 death is loss of apicoplast genome expression. While it is possible that different  
255 molecular targets account for these different inhibitor phenotypes, all apicoplast  
256 inhibitors used in this study have strong evidence for the same target in both organisms  
257 (10, 12, 13, 33). Instead, these different downstream cellular effects of apicoplast  
258 inhibitors likely reflect the different biology of the parasites and their dependence on  
259 apicoplast metabolic function.

260

261

## 262 **Materials and methods**

### 263 **Chemicals**

264 Actinonin was purchased from Sigma Aldrich and 25 mM aliquots were prepared  
265 in ethanol. Clindamycin was purchased from Sigma Aldrich and 5  $\mu$ M aliquots were  
266 prepared in water. Ciprofloxacin was purchased from Sigma Aldrich and 50  $\mu$ M aliquots  
267 were prepared in water. Atorvastatin was a gift from the Smolke lab at Stanford and 50  
268  $\mu$ M aliquots were prepared in DMSO.

269

### 270 ***Toxoplasma gondii* culture**

271 *T. gondii* RH FNR-RFP (26) was a gift from Boris Striepen (University of  
272 Pennsylvania). Parasites were maintained by passage through confluent monolayers of  
273 human foreskin fibroblasts (HFFs) host cells. HFFs were cultured in DMEM (Invitrogen)  
274 supplemented with 10% FBS (Fetal Plex Animal Serum from Gemini, West Sacramento,  
275 CA), 2 mM L-glutamine (Gemini), and 100  $\mu$ g penicillin and 100  $\mu$ g streptomycin per

276 mL (Gibco Life Technologies), maintained at 37 C and 5% CO<sub>2</sub>. Parasites were harvested  
277 for assays by syringe lysis of infected HFF monolayers.

278

### 279 **Growth inhibition assays**

280 1.5 million extracellular tachyzoites were counted by flow cytometry and allowed  
281 to infect T25 flasks containing confluent human foreskin fibroblasts (HFFs). This amount  
282 of parasites was chosen because it leads to lysis of the host monolayer after a 48-hour  
283 lytic cycle. Infected cells were then incubated with either no apicoplast inhibitor, 40 μM  
284 actinonin, 100 nM clindamycin, or 25 μM ciprofloxacin. When included, 13 μM  
285 atorvastatin was used. At designated time points during the first lytic cycle, parasites  
286 were released from HFFs using syringe lysis and either counted using flow cytometry  
287 (BD Accuri C6 Sampler) or collected for qPCR (Applied Biosystem 7900HT) or  
288 immunoblot. All time course experiments were repeated with at least 2 biological  
289 replicates.

290

### 291 **Flow cytometry and sorting**

292 Fluorescence activated cell sorting (Sony) was performed on FNR-RFP parasites  
293 grown for a full lytic cycle in either no drug, 40 μM actinonin, 100 nM clindamycin, or  
294 25 μM ciprofloxacin. Untagged parasites were used to gate on the FNR-RFP(-) cells. One  
295 million cells were sorted from each population and frozen down for subsequent analysis.

296 Flow cytometry (BD Accuri C6 Sampler) was performed to count parasites and  
297 quantify FNR-RFP fluorescence. Untagged parasites were used to gate on the FNR-RFP(-  
298 ) cells. At each time point, syringe lysed cells were washed, resuspended in PBS, and 10

299  $\mu$ L fixed volumes were quantified. Samples were always resuspended in PBS directly  
300 prior to measurement in the flow cytometer.

301

### 302 **Quantitative real-time PCR**

303 At each time point, syringe lysed parasites (1mL of culture, representing 1/4<sup>th</sup> of  
304 the total sample) was collected, spun down, and frozen prior to analysis. DNA was  
305 purified using DNAeasy Blood and Tissue (Qiagen, Germany). Primers were designed to  
306 target genes found on the apicoplast or nuclear genome: tufA (apicoplast) 5'-  
307 TGGAGCCGCACAAATGGAT-3'/5'-CTTTAGTTTGTGGCATTGGCCC- 3' and actin  
308 (nuclear) 5'- GCGCGACATCAAGGAGAAGC-3'/5'-CATCGGGCAATTCATAGGAC-  
309 3' (34). Reactions contained template DNA, 0.15  $\mu$ M of each primer, and 1x SYBR  
310 Green I Master mix (Roche). qPCR reactions were performed at 56C primer annealing  
311 and 65C template extension for 35 cycles on a Applied Biosystem 7900HT system.  
312 Relative quantification of target genes was determined (35). For each time point, the  
313 apicoplast:nuclear genome ratio was calculated relative to the appropriate control  
314 collected at the same time. The apicoplast:nuclear genome ratio was measured by qPCR  
315 two times.

316

### 317 **Immunoblot**

318 Syringe lysed parasites (1mL of culture, representing 1/4<sup>th</sup> of total sample) were  
319 washed with PBS and frozen down in 1x NuPAGE LDS Sample Buffer (Invitrogen) prior  
320 to analysis. Proteins were separated by electrophoresis on 4–12% Bis-Tris gel  
321 (Invitrogen) and transferred to a nitrocellulose membrane. After blocking, membranes

322 were probed with 1:5000 polyclonal rabbit anti-TgCpn60 (gift from Boris Striepen,  
323 University of Pennsylvania) and 1:10,000 IRDye 800RD donkey anti-rabbit (LiCor  
324 Bioscience, Lincoln, NE). Fluorescence antibody-bound proteins were detected with  
325 Odyssey Imager (LiCor Biosciences). Immunoblots were performed 2 times.

326

### 327 **Statistical Analysis**

328 When applicable, data was analyzed using Graph Pad Prism software and  
329 expressed as mean values  $\pm$  standard error of the mean (SEM). Basic experiments were  
330 repeated at least twice including both positive and negative controls. Biological replicates  
331 were performed on different days or on independent cultures while technical replicates  
332 were performed using cells from the same culture. Experiments were not blinded. All  
333 new reagents were validated prior to use. All qPCR primers were assessed for single  
334 amplicon.

335

### 336 **Acknowledgements**

337 We thank Dr. Boris Striepen for providing the *T. gondii* FNR-RFP and the TgCpn60  
338 antibody. This project has been funded with federal funds from the NIH under Award  
339 Numbers 1K08AI097239 (EY), 1DP5OD012119 (EY), and T32GM007276 (KAJ).  
340 Funding was also provided by the Burroughs-Wellcome Fund (EY), Chan-Zuckerberg  
341 Biohub (EY), and the Stanford Bio-X SIGF William and Lynda Steere Fellowship (KAJ).  
342 The funders had no role in study design, data collection and interpretation, or the decision  
343 to submit the work for publication.

344

345



## 346 Figures and Figure Legends

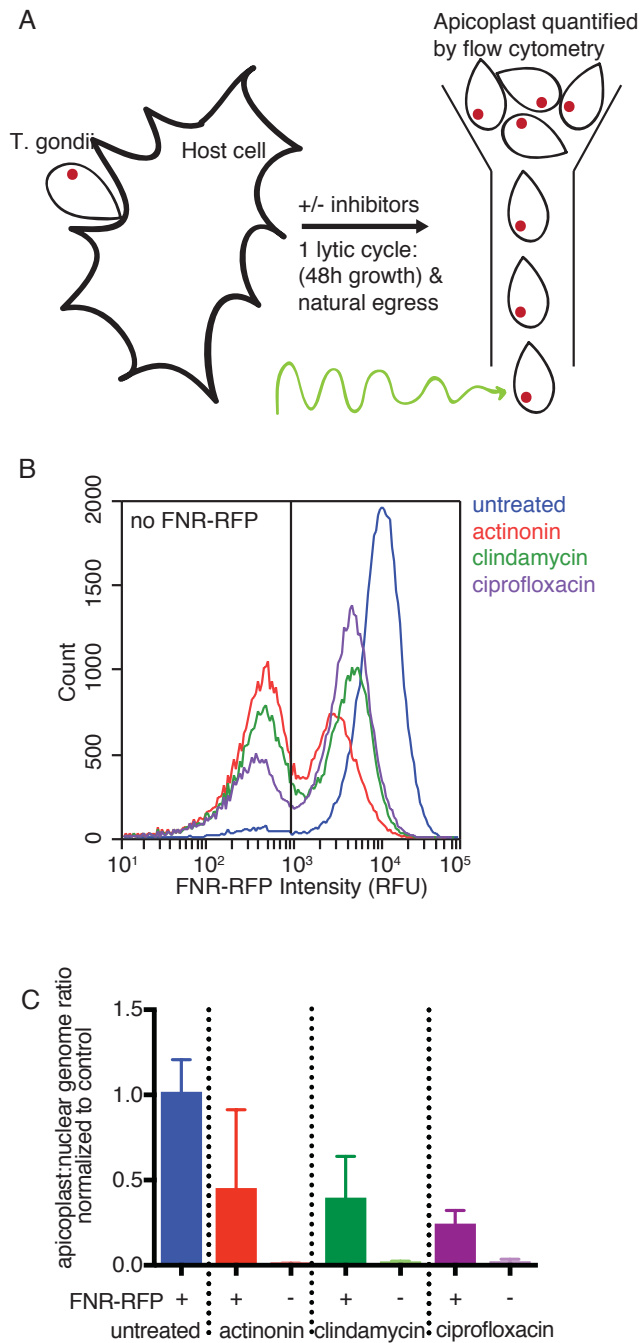

347

348 **Figure 1: Apicoplast inhibition causes reduced or absent FNR-RFP which is**

349 **correlated with apicoplast genome levels.** (A) Schematic of experimental procedure. *T.*

350 *gondii* is allowed to infect host cells for a single lytic cycle in the presence or absence of

351 apicoplast inhibitors. Resulting parasites are collected and analyzed by flow cytometry.  
352 (B) Representative histogram of FNR-RFP fluorescence intensity of parasites after a  
353 single lytic cycle of growth in the presence or absence of apicoplast inhibitors (blue =  
354 untreated, red = actinonin, green = clindamycin, purple = ciprofloxacin). Non-fluorescent  
355 gate was drawn based off of parasites that did not express FNR-RFP or any other  
356 fluorescent marker. (C) Apicoplast:nuclear genome ratio of sorted parasites after a single  
357 lytic cycle of growth in the presence or absence of apicoplast inhibitors. Gates to sort  
358 FNR-RFP(+) or FNR-RFP(-) parasites were drawn based on parasites that did not express  
359 FNR-RFP. Data is representative of two biological replicates performed in technical  
360 triplicate. Error bars represent the standard error of the mean (SEM).

361

362

363

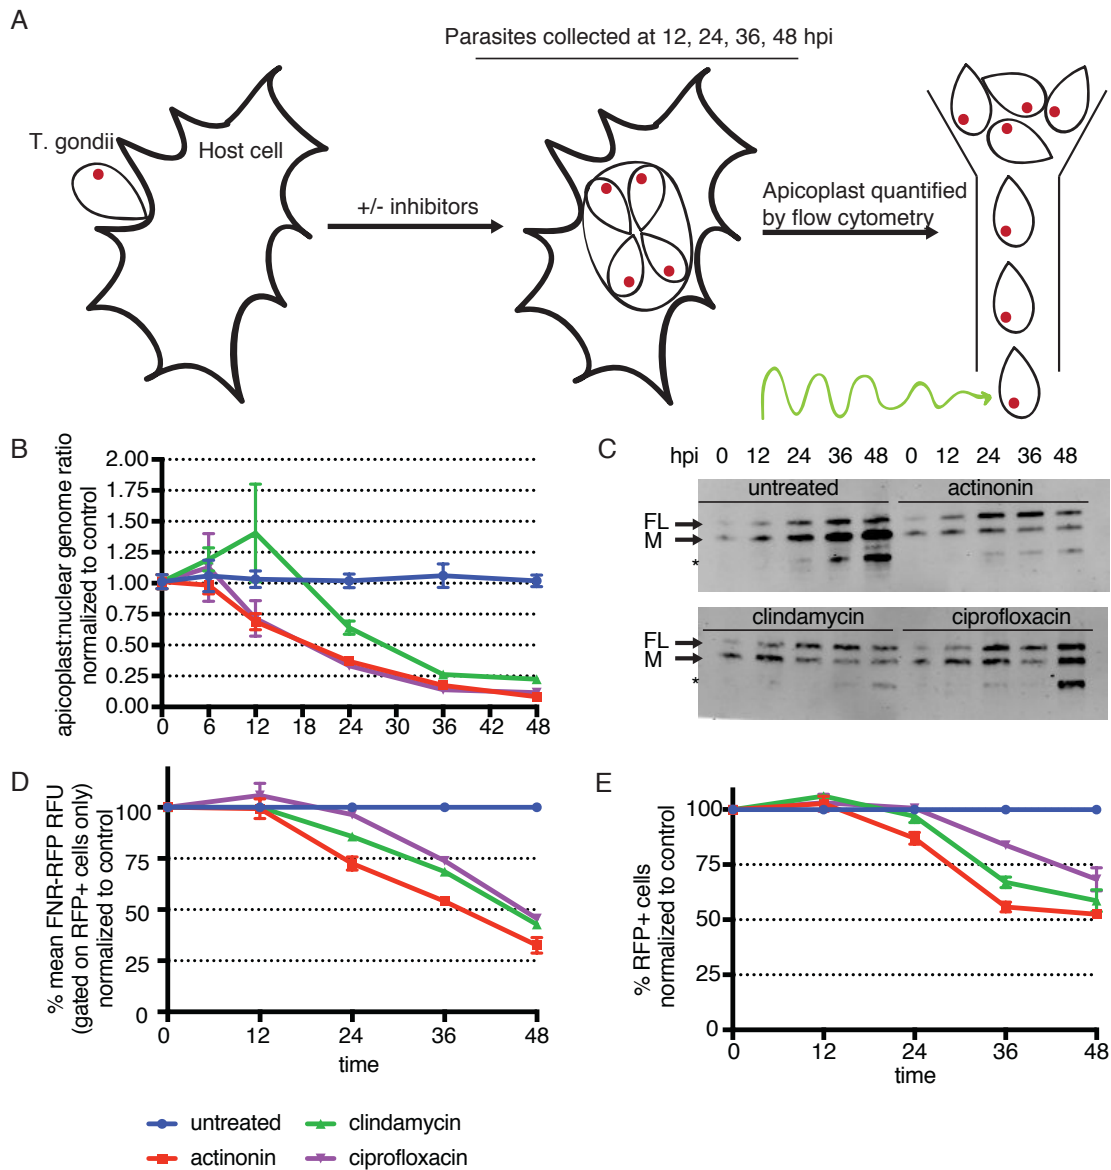

364

365 **Figure 2: Apicoplast loss occurs gradually over the first lytic cycle of treatment. (A)**

366 Schematic of experimental procedure. *T. gondii* parasites are allowed to infect host cells

367 and grow in the presence or absence of apicoplast inhibitors (blue = untreated, red =

368 actinonin, green = clindamycin, purple = ciprofloxacin). At 6, 12, 24, 36, or 48 hours,

369 parasites are manually released from host cells. Because host cell lysis occurs between 36

370 and 48 hours, parasites analyzed at these time points may reflect growth in the second

371 lytic cycle. (B) Apicoplast:nuclear genome ratio at all time points. Data is representative  
372 of two biological replicates performed in technical triplicate. Error bars represent the  
373 standard error of the mean (SEM). (C) Western blot of *TgCpn60* from 12-48 hours. FL  
374 indicates the full-length protein prior to transit-peptide cleavage. M indicates the mature  
375 protein after import into the apicoplast and transit peptide cleavage (27). Data is  
376 representative of two biological replicates. (D) The mean FNR-RFP fluorescence of  
377 parasites with detectable FNR-RFP fluorescence, normalized to control untreated  
378 parasites, from 12-48 hours. Data is representative of two biological replicates. Error bars  
379 represent the SEM. (E) Percent of cells with detectable FNR-RFP fluorescence,  
380 normalized to control untreated parasites, from 12-48 hours. Data is representative of two  
381 biological replicates. Error bars represent the standard error of the mean (SEM).  
382  
383

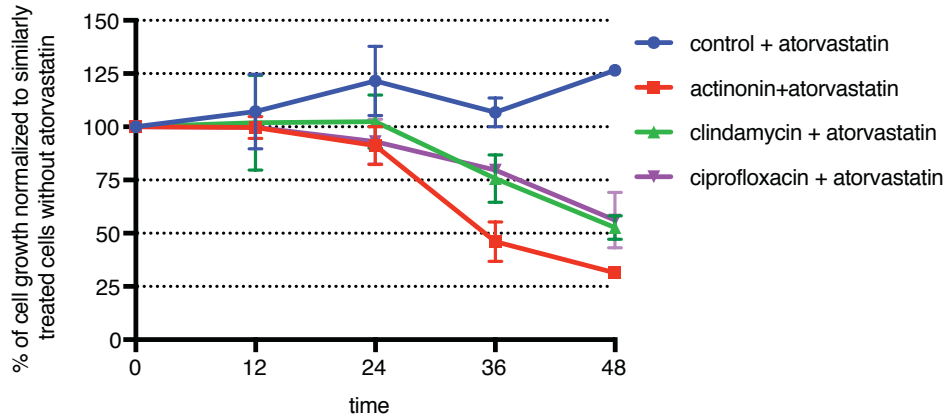

384

385 **Figure 3: Inhibition of host isoprenoid biosynthesis with atorvastatin results in**

386 **growth kinetics that deviate from delayed death.** (A) Parasite growth quantified by

387 flow cytometry of *T. gondii* manually released from host cells at each time point after

388 treatment with atorvastatin and in the presence or absence of apicomplast drugs (blue =

389 untreated, red = actinonin, green = clindamycin, purple = ciprofloxacin). Growth is

390 normalized to that of parasites treated with the same apicomplast inhibitor but in the

391 absence of atorvastatin at each time point. Data is representative of two biological

392 replicates. Error bars represent the standard error of the mean (SEM). Because host cell

393 lysis occurs between 36 and 48 hours, parasites analyzed at these time points may reflect

394 growth in the second lytic cycle.

395

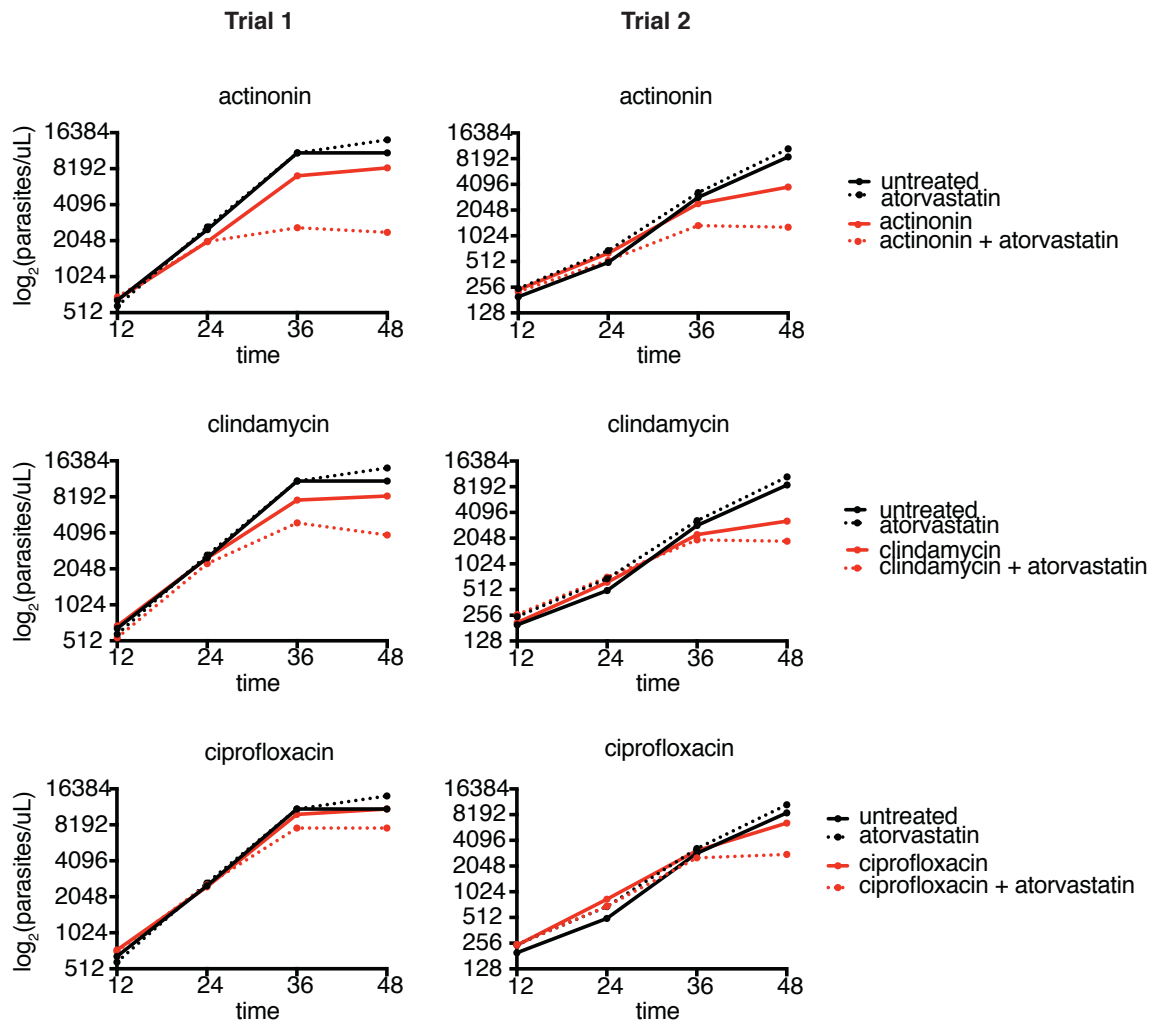

396

397 **Supplemental Figure 1: Raw growth curves demonstrate that co-treatment with**  
398 **atorvastatin and apicoplast inhibitors leads to earlier growth defects than treatment**  
399 **with either inhibitor alone.** Parasite growth quantified by flow cytometry of *T. gondii*  
400 manually released from host cells at each time point after treatment with or without  
401 atorvastatin or apicoplast inhibitors. Each biological replicate is plotted separately with

402 the respective controls from that experiment.

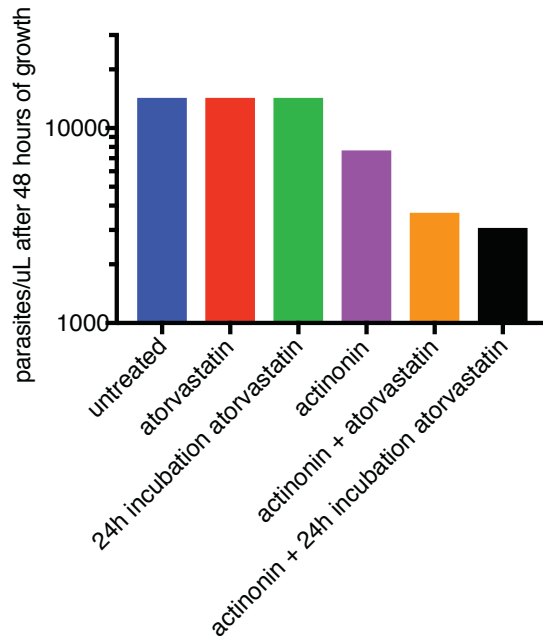

403

404 **Supplementary Figure 2: Pre-incubation of host cells with atorvastatin for 24 hours**

405 **prior to infection does not exacerbate growth defect of cells co-treated with**

406 **atorvastatin and apicoplast inhibitors.** 1.5 million parasites were allowed to infect T25

407 flasks containing confluent human foreskin fibroblasts (HFFs) that were either untreated

408 or pre-incubated with atorvastatin for 24 hours prior to infection. Infected cells were then

409 incubated with either no inhibitor, atorvastatin only, actinonin only or

410 actinonin+atorvastatin. Parasite growth at the end of a 48 hour lytic cycle was quantified

411 by flow cytometry. Results are from a single biological replicate.

412

#### 413 **References**

- 414 1. Kohler S, Delwiche CF, Denny PW, Tilney LG, Webster P, Wilson RJ, Palmer  
415 JD, Roos DS. 1997. A plastid of probable green algal origin in Apicomplexan  
416 parasites. *Science* 275:1485-9.

- 417 2. McFadden GI, Reith ME, Munholland J, Lang-Unnasch N. 1996. Plastid in  
418 human parasites. *Nature* 381:482.
- 419 3. Janouskovec J, Horak A, Obornik M, Lukes J, Keeling PJ. 2010. A common red  
420 algal origin of the apicomplexan, dinoflagellate, and heterokont plastids. *Proc*  
421 *Natl Acad Sci U S A* 107:10949-54.
- 422 4. Mazumdar J, H. Wilson E, Masek K, A. Hunter C, Striepen B. 2006. Apicoplast  
423 fatty acid synthesis is essential for organelle biogenesis and parasite survival in  
424 *Toxoplasma gondii*. *Proceedings of the National Academy of*  
425 *Sciences* 103:13192-13197.
- 426 5. Nair SC, Brooks CF, Goodman CD, Strurm A, McFadden GI, Sundriyal S, Anglin  
427 JL, Song Y, Moreno SNJ, Striepen B. 2011. Apicoplast isoprenoid precursor  
428 synthesis and the molecular basis of fosmidomycin resistance in *Toxoplasma*  
429 *gondii*. *The Journal of Experimental Medicine* 208:1547-1559.
- 430 6. Yeh E, DeRisi JL. 2011. Chemical rescue of malaria parasites lacking an  
431 apicoplast defines organelle function in blood-stage *Plasmodium falciparum*.  
432 *PLoS Biol* 9:e1001138.
- 433 7. Rolston KV. 1991. Treatment of acute toxoplasmosis with oral clindamycin. *Eur J*  
434 *Clin Microbiol Infect Dis* 10:181-3.
- 435 8. Geary TG, Jensen JB. 1983. Effects of antibiotics on *Plasmodium falciparum* in  
436 vitro. *Am J Trop Med Hyg* 32:221-5.
- 437 9. Fichera ME, Bhopale MK, Roos DS. 1995. In vitro assays elucidate peculiar  
438 kinetics of clindamycin action against *Toxoplasma gondii*. *Antimicrob Agents*  
439 *Chemother* 39:1530-7.
- 440 10. Fichera ME, Roos DS. 1997. A plastid organelle as a drug target in apicomplexan  
441 parasites. *Nature* 390:407-9.
- 442 11. Dahl EL, Shock JL, Shenai BR, Gut J, DeRisi JL, Rosenthal PJ. 2006.  
443 Tetracyclines specifically target the apicoplast of the malaria parasite *Plasmodium*  
444 *falciparum*. *Antimicrob Agents Chemother* 50:3124-31.
- 445 12. Amberg-Johnson K, Hari SB, Ganesan SM, Lorenzi HA, Sauer RT, Niles JC, Yeh  
446 E. 2017. Small molecule inhibition of apicomplexan FtsH1 disrupts plastid  
447 biogenesis in human pathogens. 6.
- 448 13. Camps M, Arrizabalaga G, Boothroyd J. 2002. An rRNA mutation identifies the  
449 apicoplast as the target for clindamycin in *Toxoplasma gondii*. *Mol Microbiol*  
450 43:1309-18.
- 451 14. Ralph SA, van Dooren GG, Waller RF, Crawford MJ, Fraunholz MJ, Foth BJ,  
452 Tonkin CJ, Roos DS, McFadden GI. 2004. Tropical infectious diseases: metabolic  
453 maps and functions of the *Plasmodium falciparum* apicoplast. *Nat Rev Microbiol*  
454 2:203-16.
- 455 15. Martins-Duarte ES, Carias M, Vommaro R, Surolia N, de Souza W. 2016.  
456 Apicoplast fatty acid synthesis is essential for pellicle formation at the end of  
457 cytokinesis in *Toxoplasma gondii*. *J Cell Sci* 129:3320-31.
- 458 16. McLeod R, Muench SP, Rafferty JB, Kyle DE, Mui EJ, Kirisits MJ, Mack DG,  
459 Roberts CW, Samuel BU, Lyons RE, Dorris M, Milhous WK, Rice DW. 2001.  
460 Triclosan inhibits the growth of *Plasmodium falciparum* and *Toxoplasma gondii*  
461 by inhibition of apicomplexan Fab I. *Int J Parasitol* 31:109-13.



- 462 17. Mazumdar J, E HW, Masek K, C AH, Striepen B. 2006. Apicoplast fatty acid  
463 synthesis is essential for organelle biogenesis and parasite survival in *Toxoplasma*  
464 *gondii*. *Proc Natl Acad Sci U S A* 103:13192-7.
- 465 18. Reiff SB, Vaishnava S, Striepen B. 2012. The HU protein is important for  
466 apicoplast genome maintenance and inheritance in *Toxoplasma gondii*. *Eukaryot*  
467 *Cell* 11:905-15.
- 468 19. Frenal K, Jacot D, Hammoudi PM, Graindorge A, Maco B, Soldati-Favre D.  
469 2017. Myosin-dependent cell-cell communication controls synchronicity of  
470 division in acute and chronic stages of *Toxoplasma gondii*. 8:15710.
- 471 20. Crawford MJ, Thomsen-Zieger N, Ray M, Schachtner J, Roos DS, Seeber F.  
472 2006. *Toxoplasma gondii* scavenges host-derived lipoic acid despite its de novo  
473 synthesis in the apicoplast. *Embo j* 25:3214-22.
- 474 21. Agrawal S, Chung DW, Ponts N, van Dooren GG, Prudhomme J, Brooks CF,  
475 Rodrigues EM, Tan JC, Ferdig MT, Striepen B, Le Roch KG. 2013. An apicoplast  
476 localized ubiquitylation system is required for the import of nuclear-encoded  
477 plastid proteins. *PLoS Pathog* 9:e1003426.
- 478 22. Sheiner L, Fellows JD, Ovcariikova J, Brooks CF, Agrawal S, Holmes ZC, Bietz  
479 I, Flinner N, Heiny S, Mirus O, Przyborski JM, Striepen B. 2015. *Toxoplasma*  
480 *gondii* Toc75 Functions in Import of Stromal but not Peripheral Apicoplast  
481 Proteins. *Traffic* 16:1254-69.
- 482 23. van Dooren GG, Reiff SB, Tomova C, Meissner M, Humbel BM, Striepen B.  
483 2009. A novel dynamin-related protein has been recruited for apicoplast fission in  
484 *Toxoplasma gondii*. *Curr Biol* 19:267-76.
- 485 24. van Dooren GG, Tomova C, Agrawal S, Humbel BM, Striepen B. 2008.  
486 *Toxoplasma gondii* Tic20 is essential for apicoplast protein import. *Proc Natl*  
487 *Acad Sci U S A* 105:13574-9.
- 488 25. Black MW, Boothroyd JC. 2000. Lytic cycle of *Toxoplasma gondii*. *Microbiol*  
489 *Mol Biol Rev* 64:607-23.
- 490 26. Striepen B, Crawford MJ, Shaw MK, Tilney LG, Seeber F, Roos DS. 2000. The  
491 plastid of *Toxoplasma gondii* is divided by association with centrosomes. *The*  
492 *Journal of Cell Biology* 151:1423-1434.
- 493 27. Agrawal S, van Dooren GG, Beatty WL, Striepen B. 2009. Genetic evidence that  
494 an endosymbiont-derived endoplasmic reticulum-associated protein degradation  
495 (ERAD) system functions in import of apicoplast proteins. *J Biol Chem*  
496 284:33683-91.
- 497 28. Li ZH, Ramakrishnan S, Striepen B, Moreno SN. 2013. *Toxoplasma gondii* relies  
498 on both host and parasite isoprenoids and can be rendered sensitive to  
499 atorvastatin. *PLoS Pathog* 9:e1003665.
- 500 29. Lim L, McFadden GI. 2010. The evolution, metabolism and functions of the  
501 apicoplast. *Philos Trans R Soc Lond B Biol Sci* 365:749-63.
- 502 30. Bisanz C, Bastien O, Grando D, Jouhet J, Marechal E, Cesbron-Delauw MF.  
503 2006. *Toxoplasma gondii* acyl-lipid metabolism: de novo synthesis from  
504 apicoplast-generated fatty acids versus scavenging of host cell precursors.  
505 *Biochem J* 394:197-205.
- 506 31. Coppens I. 2006. Contribution of host lipids to *Toxoplasma* pathogenesis. *Cell*  
507 *Microbiol* 8:1-9.

- 508 32. Hu X, Binns D, Reese ML. 2017. The coccidian parasites *Toxoplasma* and  
509 *Neospora* dysregulate mammalian lipid droplet biogenesis. *J Biol Chem*  
510 292:11009-11020.
- 511 33. Dahl EL, Rosenthal PJ. 2007. Multiple antibiotics exert delayed effects against  
512 the *Plasmodium falciparum* apicoplast. *Antimicrob Agents Chemother* 51:3485-  
513 90.
- 514 34. Lamarque MH, Roques M, Kong-Hap M, Tonkin ML, Rugarabamu G, Marq JB,  
515 Penarete-Vargas DM, Boulanger MJ, Soldati-Favre D, Lebrun M. 2014. Plasticity  
516 and redundancy among AMA-RON pairs ensure host cell entry of *Toxoplasma*  
517 parasites. *Nat Commun* 5:4098.
- 518 35. Pfaffl MW. 2001. A new mathematical model for relative quantification in real-  
519 time RT-PCR. *Nucleic Acids Res* 29:e45.
- 520
